# Supplementary material for: Multi-method study of the Middle Pleistocene loess–palaeosol sequence of Köndringen, SW Germany
Source: Copernicus journal article supplement (doi:10.5194/egqsj-72-1-2023), 2023-01-20
Supplement: Supplementary file 1 [file egqsj-72-1-2023-supplement.zip]

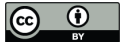

*Supplement of*

## **Multi-method study of the Middle Pleistocene loess–palaeosol sequence of Köndringen, SW Germany**

**Lea Schwahn et al.**

*Correspondence to:* Frank Preusser ([frank.preusser@geologie.uni-freiburg.de](mailto:frank.preusser@geologie.uni-freiburg.de))

- [egqsj-72-1-2023-supplement-title-page.pdf](#)
- Schwahn et al. Supplementary data luminescence Table S1-4.docx
- Schwahn et al. Supplementary data sedimentology Figure 4.xlsx

The copyright of individual parts of the supplement might differ from the article licence.
